# Supplementary material for: The influence of methodological procedures on hydrological classification performance
Source: Copernicus journal article supplement (doi:10.5194/hess-18-3393-2014), 2014-09-05
Supplement: Supplementary file [file hess-18-3393-2014-supplement.pdf]

Supplement of Hydrol. Earth Syst. Sci., 18, 3393–3409, 2014  
<http://www.hydrol-earth-syst-sci.net/18/3393/2014/>  
doi:10.5194/hess-18-3393-2014-supplement  
© Author(s) 2014. CC Attribution 3.0 License.

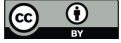

*Supplement of*

## **The influence of methodological procedures on hydrological classification performance**

**F. J. Peñas et al.**

*Correspondence to:* F. J. Peñas (penasfj@unican.es)

Table S1:  $r^2$  and standard deviation of  $r^2$  (sd) of all the tested indices in the ANOVA analysis. We selected 6, 11 and 16-Class levels to illustrate the classification performance of rawClasF and rawPredF classifications. Graphical examples of several indices are shown in Figure 5.

|       | Level 6  |     |          |     | Level 11 |     |          |     | Level 16 |     |          |     |
|-------|----------|-----|----------|-----|----------|-----|----------|-----|----------|-----|----------|-----|
|       | rawPredF |     | rawClasF |     | rawPredF |     | rawClasF |     | rawPredF |     | rawClasF |     |
| Index | $R^2$    | sd  | $R^2$    | sd  | $R^2$    | sd  | $R^2$    | sd  | $R^2$    | sd  | $R^2$    | sd  |
| 11    | 0.6      | 0.1 | 0.4      | 0.1 | 0.6      | 0.0 | 0.5      | 0.1 | 0.8      | 0.0 | 0.5      | 0.1 |
| 12    | 0.6      | 0.1 | 0.4      | 0.1 | 0.6      | 0.0 | 0.5      | 0.1 | 0.8      | 0.0 | 0.5      | 0.1 |
| Lca   | 0.3      | 0.0 | 0.2      | 0.0 | 0.4      | 0.1 | 0.2      | 0.0 | 0.5      | 0.1 | 0.3      | 0.1 |
| lcv   | 0.3      | 0.1 | 0.3      | 0.0 | 0.3      | 0.0 | 0.2      | 0.1 | 0.4      | 0.0 | 0.4      | 0.1 |
| lkur  | 0.2      | 0.0 | 0.1      | 0.0 | 0.4      | 0.1 | 0.2      | 0.1 | 0.5      | 0.1 | 0.3      | 0.1 |
| M1    | 0.7      | 0.1 | 0.4      | 0.1 | 0.6      | 0.0 | 0.5      | 0.1 | 0.8      | 0.0 | 0.5      | 0.1 |
| M2    | 0.6      | 0.1 | 0.4      | 0.1 | 0.6      | 0.0 | 0.5      | 0.1 | 0.8      | 0.0 | 0.5      | 0.1 |
| M3    | 0.6      | 0.1 | 0.4      | 0.1 | 0.6      | 0.0 | 0.5      | 0.1 | 0.8      | 0.0 | 0.5      | 0.1 |
| M4    | 0.6      | 0.0 | 0.4      | 0.1 | 0.6      | 0.0 | 0.5      | 0.1 | 0.8      | 0.0 | 0.5      | 0.1 |
| M5    | 0.6      | 0.1 | 0.4      | 0.1 | 0.6      | 0.0 | 0.5      | 0.1 | 0.8      | 0.1 | 0.5      | 0.1 |
| M6    | 0.5      | 0.1 | 0.3      | 0.1 | 0.5      | 0.1 | 0.5      | 0.1 | 0.7      | 0.1 | 0.4      | 0.1 |
| M7    | 0.5      | 0.1 | 0.4      | 0.1 | 0.6      | 0.0 | 0.5      | 0.1 | 0.7      | 0.1 | 0.5      | 0.1 |
| M8    | 0.5      | 0.0 | 0.3      | 0.1 | 0.5      | 0.0 | 0.5      | 0.1 | 0.6      | 0.1 | 0.5      | 0.1 |
| M9    | 0.5      | 0.1 | 0.3      | 0.1 | 0.5      | 0.0 | 0.5      | 0.1 | 0.7      | 0.1 | 0.5      | 0.1 |
| M10   | 0.5      | 0.1 | 0.3      | 0.1 | 0.5      | 0.0 | 0.5      | 0.1 | 0.7      | 0.1 | 0.5      | 0.1 |
| M11   | 0.6      | 0.1 | 0.4      | 0.1 | 0.6      | 0.0 | 0.5      | 0.1 | 0.8      | 0.1 | 0.5      | 0.1 |
| M12   | 0.7      | 0.1 | 0.4      | 0.1 | 0.7      | 0.0 | 0.5      | 0.1 | 0.8      | 0.0 | 0.5      | 0.1 |
| Mx1   | 0.6      | 0.1 | 0.4      | 0.1 | 0.5      | 0.1 | 0.5      | 0.1 | 0.8      | 0.0 | 0.5      | 0.1 |
| MxM2  | 0.6      | 0.1 | 0.4      | 0.1 | 0.6      | 0.1 | 0.5      | 0.1 | 0.8      | 0.0 | 0.5      | 0.1 |
| MxM3  | 0.6      | 0.1 | 0.4      | 0.1 | 0.6      | 0.1 | 0.5      | 0.1 | 0.8      | 0.0 | 0.4      | 0.1 |
| MxM4  | 0.6      | 0.1 | 0.4      | 0.1 | 0.5      | 0.0 | 0.5      | 0.1 | 0.7      | 0.1 | 0.5      | 0.1 |
| MxM5  | 0.6      | 0.1 | 0.4      | 0.1 | 0.6      | 0.1 | 0.5      | 0.1 | 0.8      | 0.0 | 0.5      | 0.1 |
| MxM6  | 0.5      | 0.1 | 0.3      | 0.1 | 0.5      | 0.0 | 0.4      | 0.1 | 0.7      | 0.1 | 0.4      | 0.1 |

|       |     |     |     |     |     |     |     |     |     |     |     |     |
|-------|-----|-----|-----|-----|-----|-----|-----|-----|-----|-----|-----|-----|
| MxM7  | 0.4 | 0.1 | 0.3 | 0.1 | 0.4 | 0.1 | 0.4 | 0.1 | 0.7 | 0.0 | 0.4 | 0.1 |
| MxM8  | 0.4 | 0.1 | 0.3 | 0.1 | 0.3 | 0.1 | 0.3 | 0.1 | 0.5 | 0.1 | 0.4 | 0.1 |
| MxM9  | 0.4 | 0.1 | 0.3 | 0.1 | 0.3 | 0.0 | 0.4 | 0.1 | 0.5 | 0.1 | 0.4 | 0.1 |
| MxM10 | 0.5 | 0.1 | 0.3 | 0.1 | 0.4 | 0.0 | 0.4 | 0.1 | 0.6 | 0.1 | 0.5 | 0.1 |
| MxM11 | 0.6 | 0.1 | 0.4 | 0.1 | 0.5 | 0.0 | 0.5 | 0.1 | 0.8 | 0.1 | 0.5 | 0.1 |
| MxM12 | 0.6 | 0.1 | 0.4 | 0.1 | 0.5 | 0.1 | 0.5 | 0.1 | 0.8 | 0.0 | 0.5 | 0.1 |
| MnM1  | 0.5 | 0.1 | 0.3 | 0.1 | 0.6 | 0.0 | 0.5 | 0.1 | 0.7 | 0.1 | 0.5 | 0.1 |
| MnM2  | 0.4 | 0.1 | 0.3 | 0.1 | 0.5 | 0.1 | 0.4 | 0.1 | 0.6 | 0.1 | 0.4 | 0.1 |
| MnM3  | 0.5 | 0.1 | 0.3 | 0.1 | 0.6 | 0.1 | 0.4 | 0.1 | 0.6 | 0.1 | 0.4 | 0.1 |
| MnM4  | 0.4 | 0.1 | 0.3 | 0.1 | 0.5 | 0.1 | 0.3 | 0.1 | 0.6 | 0.1 | 0.3 | 0.1 |
| MnM5  | 0.5 | 0.1 | 0.3 | 0.1 | 0.6 | 0.1 | 0.5 | 0.1 | 0.7 | 0.1 | 0.4 | 0.1 |
| MnM6  | 0.4 | 0.1 | 0.3 | 0.1 | 0.5 | 0.1 | 0.4 | 0.1 | 0.6 | 0.1 | 0.4 | 0.1 |
| MnM7  | 0.4 | 0.1 | 0.3 | 0.1 | 0.5 | 0.1 | 0.5 | 0.1 | 0.6 | 0.1 | 0.4 | 0.1 |
| MnM8  | 0.3 | 0.0 | 0.3 | 0.1 | 0.4 | 0.1 | 0.5 | 0.0 | 0.5 | 0.1 | 0.4 | 0.1 |
| MnM9  | 0.3 | 0.1 | 0.2 | 0.1 | 0.4 | 0.1 | 0.4 | 0.1 | 0.5 | 0.1 | 0.4 | 0.1 |
| MnM10 | 0.4 | 0.1 | 0.3 | 0.1 | 0.5 | 0.1 | 0.4 | 0.1 | 0.5 | 0.1 | 0.4 | 0.1 |
| MnM11 | 0.6 | 0.0 | 0.3 | 0.1 | 0.6 | 0.1 | 0.5 | 0.1 | 0.7 | 0.1 | 0.4 | 0.1 |
| MnM12 | 0.6 | 0.1 | 0.3 | 0.1 | 0.7 | 0.1 | 0.5 | 0.2 | 0.6 | 0.1 | 0.4 | 0.1 |
| 1LF   | 0.6 | 0.0 | 0.4 | 0.1 | 0.6 | 0.0 | 0.6 | 0.1 | 0.7 | 0.1 | 0.5 | 0.1 |
| 3LF   | 0.6 | 0.0 | 0.4 | 0.1 | 0.6 | 0.0 | 0.6 | 0.1 | 0.7 | 0.1 | 0.5 | 0.1 |
| 7LF   | 0.6 | 0.0 | 0.4 | 0.1 | 0.6 | 0.0 | 0.6 | 0.1 | 0.7 | 0.1 | 0.5 | 0.1 |
| 30LF  | 0.5 | 0.0 | 0.4 | 0.1 | 0.6 | 0.0 | 0.5 | 0.1 | 0.7 | 0.1 | 0.5 | 0.1 |
| 90LF  | 0.5 | 0.1 | 0.4 | 0.1 | 0.6 | 0.0 | 0.5 | 0.1 | 0.7 | 0.1 | 0.5 | 0.1 |
| X75   | 0.6 | 0.0 | 0.4 | 0.1 | 0.6 | 0.0 | 0.6 | 0.1 | 0.8 | 0.1 | 0.5 | 0.1 |
| X95   | 0.5 | 0.1 | 0.3 | 0.1 | 0.5 | 0.1 | 0.5 | 0.1 | 0.6 | 0.1 | 0.4 | 0.1 |
| ZFD   | 0.1 | 0.0 | 0.1 | 0.0 | 0.2 | 0.0 | 0.2 | 0.1 | 0.2 | 0.0 | 0.2 | 0.0 |
| BFI   | 0.3 | 0.1 | 0.3 | 0.1 | 0.3 | 0.0 | 0.3 | 0.1 | 0.3 | 0.0 | 0.3 | 0.0 |
| 1HF   | 0.5 | 0.1 | 0.3 | 0.1 | 0.5 | 0.0 | 0.5 | 0.1 | 0.7 | 0.1 | 0.5 | 0.1 |
| 3 HF  | 0.6 | 0.1 | 0.3 | 0.1 | 0.5 | 0.0 | 0.5 | 0.1 | 0.7 | 0.1 | 0.5 | 0.1 |
| 7 HF  | 0.6 | 0.1 | 0.4 | 0.1 | 0.6 | 0.0 | 0.5 | 0.1 | 0.8 | 0.1 | 0.5 | 0.1 |
| 30 HF | 0.6 | 0.1 | 0.4 | 0.1 | 0.6 | 0.0 | 0.5 | 0.1 | 0.8 | 0.0 | 0.5 | 0.1 |
| 90 HF | 0.6 | 0.1 | 0.4 | 0.1 | 0.6 | 0.0 | 0.5 | 0.1 | 0.8 | 0.0 | 0.5 | 0.1 |
| X25   | 0.6 | 0.1 | 0.4 | 0.1 | 0.6 | 0.0 | 0.5 | 0.1 | 0.8 | 0.0 | 0.5 | 0.1 |
| X5    | 0.6 | 0.1 | 0.4 | 0.1 | 0.6 | 0.0 | 0.5 | 0.1 | 0.8 | 0.0 | 0.5 | 0.1 |
| FRE1  | 0.5 | 0.1 | 0.5 | 0.1 | 0.7 | 0.0 | 0.5 | 0.1 | 0.7 | 0.0 | 0.6 | 0.0 |

|         |     |     |     |     |     |     |     |     |     |     |     |     |
|---------|-----|-----|-----|-----|-----|-----|-----|-----|-----|-----|-----|-----|
| FRE3    | 0.5 | 0.1 | 0.6 | 0.1 | 0.6 | 0.1 | 0.6 | 0.1 | 0.7 | 0.1 | 0.6 | 0.1 |
| FRE7    | 0.4 | 0.1 | 0.5 | 0.1 | 0.6 | 0.1 | 0.5 | 0.1 | 0.6 | 0.0 | 0.5 | 0.1 |
| nPHigh  | 0.5 | 0.1 | 0.5 | 0.0 | 0.5 | 0.0 | 0.5 | 0.1 | 0.6 | 0.1 | 0.5 | 0.1 |
| dPHigh  | 0.4 | 0.1 | 0.4 | 0.1 | 0.5 | 0.1 | 0.4 | 0.1 | 0.5 | 0.1 | 0.5 | 0.1 |
| JMax    | 0.1 | 0.0 | 0.1 | 0.0 | 0.2 | 0.1 | 0.3 | 0.1 | 0.4 | 0.1 | 0.4 | 0.0 |
| JMin    | 0.2 | 0.1 | 0.2 | 0.0 | 0.2 | 0.1 | 0.3 | 0.1 | 0.3 | 0.0 | 0.2 | 0.1 |
| Pred    | 0.3 | 0.1 | 0.3 | 0.1 | 0.4 | 0.1 | 0.4 | 0.1 | 0.4 | 0.1 | 0.4 | 0.1 |
| Pos     | 0.5 | 0.0 | 0.3 | 0.1 | 0.4 | 0.0 | 0.4 | 0.1 | 0.6 | 0.1 | 0.5 | 0.1 |
| nPos    | 0.5 | 0.1 | 0.5 | 0.1 | 0.6 | 0.1 | 0.5 | 0.1 | 0.6 | 0.1 | 0.6 | 0.1 |
| Neg     | 0.5 | 0.0 | 0.3 | 0.1 | 0.5 | 0.0 | 0.4 | 0.1 | 0.6 | 0.1 | 0.5 | 0.1 |
| nNeg    | 0.5 | 0.1 | 0.5 | 0.1 | 0.6 | 0.1 | 0.5 | 0.1 | 0.6 | 0.1 | 0.6 | 0.1 |
| Rev     | 0.3 | 0.1 | 0.2 | 0.1 | 0.4 | 0.1 | 0.4 | 0.1 | 0.4 | 0.1 | 0.4 | 0.1 |
| sdM1    | 0.6 | 0.1 | 0.4 | 0.1 | 0.6 | 0.1 | 0.5 | 0.1 | 0.8 | 0.1 | 0.5 | 0.1 |
| sdM2    | 0.6 | 0.1 | 0.4 | 0.1 | 0.6 | 0.0 | 0.5 | 0.1 | 0.8 | 0.0 | 0.5 | 0.1 |
| sdM3    | 0.6 | 0.1 | 0.3 | 0.1 | 0.6 | 0.0 | 0.5 | 0.1 | 0.7 | 0.0 | 0.5 | 0.1 |
| sdM4    | 0.6 | 0.0 | 0.4 | 0.1 | 0.6 | 0.0 | 0.5 | 0.1 | 0.7 | 0.0 | 0.5 | 0.1 |
| sdM5    | 0.6 | 0.0 | 0.4 | 0.1 | 0.6 | 0.0 | 0.5 | 0.1 | 0.8 | 0.1 | 0.5 | 0.1 |
| sdM6    | 0.5 | 0.0 | 0.3 | 0.1 | 0.5 | 0.0 | 0.4 | 0.1 | 0.7 | 0.1 | 0.4 | 0.1 |
| sdM7    | 0.5 | 0.1 | 0.3 | 0.1 | 0.5 | 0.0 | 0.4 | 0.1 | 0.7 | 0.0 | 0.4 | 0.1 |
| sdM8    | 0.4 | 0.1 | 0.3 | 0.1 | 0.3 | 0.1 | 0.3 | 0.1 | 0.5 | 0.1 | 0.4 | 0.1 |
| sdM9    | 0.4 | 0.1 | 0.3 | 0.1 | 0.4 | 0.0 | 0.4 | 0.1 | 0.6 | 0.1 | 0.4 | 0.1 |
| sdM10   | 0.5 | 0.1 | 0.3 | 0.1 | 0.5 | 0.0 | 0.5 | 0.1 | 0.7 | 0.1 | 0.5 | 0.1 |
| sdM11   | 0.6 | 0.1 | 0.4 | 0.1 | 0.6 | 0.0 | 0.5 | 0.1 | 0.8 | 0.1 | 0.6 | 0.1 |
| sdM12   | 0.6 | 0.1 | 0.4 | 0.1 | 0.6 | 0.1 | 0.5 | 0.1 | 0.8 | 0.0 | 0.5 | 0.1 |
| sd1LF   | 0.6 | 0.1 | 0.5 | 0.1 | 0.7 | 0.1 | 0.5 | 0.1 | 0.8 | 0.1 | 0.5 | 0.1 |
| sd3LF   | 0.6 | 0.1 | 0.4 | 0.1 | 0.7 | 0.1 | 0.5 | 0.1 | 0.7 | 0.0 | 0.5 | 0.1 |
| sd7LF   | 0.6 | 0.1 | 0.4 | 0.1 | 0.7 | 0.1 | 0.5 | 0.1 | 0.8 | 0.0 | 0.5 | 0.1 |
| sd30LF  | 0.5 | 0.1 | 0.4 | 0.1 | 0.6 | 0.1 | 0.5 | 0.1 | 0.7 | 0.0 | 0.5 | 0.1 |
| sd90LF  | 0.5 | 0.1 | 0.4 | 0.1 | 0.5 | 0.1 | 0.5 | 0.1 | 0.7 | 0.0 | 0.5 | 0.1 |
| sdBFI   | 0.2 | 0.0 | 0.2 | 0.0 | 0.2 | 0.0 | 0.3 | 0.1 | 0.2 | 0.0 | 0.3 | 0.0 |
| sd1HF   | 0.3 | 0.1 | 0.4 | 0.1 | 0.4 | 0.1 | 0.4 | 0.0 | 0.5 | 0.1 | 0.4 | 0.1 |
| sd3 HF  | 0.4 | 0.1 | 0.2 | 0.1 | 0.3 | 0.0 | 0.4 | 0.1 | 0.6 | 0.0 | 0.4 | 0.1 |
| sd7 HF  | 0.5 | 0.1 | 0.3 | 0.1 | 0.4 | 0.1 | 0.4 | 0.1 | 0.7 | 0.1 | 0.5 | 0.1 |
| sd30 HF | 0.5 | 0.1 | 0.3 | 0.1 | 0.5 | 0.1 | 0.4 | 0.1 | 0.7 | 0.1 | 0.5 | 0.1 |
| sd90 HF | 0.6 | 0.1 | 0.3 | 0.1 | 0.5 | 0.0 | 0.5 | 0.1 | 0.8 | 0.1 | 0.5 | 0.1 |

|        |     |     |     |     |     |     |     |     |     |     |     |     |
|--------|-----|-----|-----|-----|-----|-----|-----|-----|-----|-----|-----|-----|
| sdFRE1 | 0.6 | 0.1 | 0.3 | 0.1 | 0.5 | 0.0 | 0.5 | 0.1 | 0.7 | 0.1 | 0.5 | 0.1 |
| sdFRE3 | 0.4 | 0.1 | 0.4 | 0.1 | 0.4 | 0.1 | 0.5 | 0.1 | 0.5 | 0.1 | 0.6 | 0.1 |
| sdFRE7 | 0.2 | 0.1 | 0.2 | 0.1 | 0.2 | 0.0 | 0.2 | 0.0 | 0.3 | 0.1 | 0.3 | 0.0 |
| sdnPH  | 0.3 | 0.1 | 0.4 | 0.1 | 0.4 | 0.1 | 0.2 | 0.1 | 0.4 | 0.1 | 0.2 | 0.0 |
| sdJMax | 0.2 | 0.1 | 0.2 | 0.0 | 0.3 | 0.1 | 0.2 | 0.0 | 0.3 | 0.0 | 0.2 | 0.0 |
| sdJMin | 0.3 | 0.1 | 0.3 | 0.1 | 0.3 | 0.1 | 0.3 | 0.1 | 0.4 | 0.0 | 0.3 | 0.1 |
| sdnNeg | 0.1 | 0.0 | 0.1 | 0.0 | 0.2 | 0.0 | 0.2 | 0.1 | 0.3 | 0.0 | 0.1 | 0.0 |
| sdnPos | 0.2 | 0.0 | 0.2 | 0.1 | 0.3 | 0.0 | 0.2 | 0.1 | 0.3 | 0.0 | 0.3 | 0.1 |
| sdRev  | 0.2 | 0.0 | 0.2 | 0.1 | 0.2 | 0.0 | 0.2 | 0.1 | 0.2 | 0.0 | 0.2 | 0.0 |

Table S2:  $r^2$  and standard deviation of  $r^2$  (sd) of all the tested indices in the ANOVA analysis. We selected 6, 11 and 16-Class levels to illustrate the classification performance of norClasF and norPredF classifications. Graphical examples of several indices are shown in Figure 6.

| Index | Level 6  |     |          |     | Level 11 |     |          |     | Level 16 |     |          |     |
|-------|----------|-----|----------|-----|----------|-----|----------|-----|----------|-----|----------|-----|
|       | norPredF |     | norClasF |     | norPredF |     | norClasF |     | norPredF |     | norClasF |     |
|       | $R^2$    | sd  | $R^2$    | sd  | $R^2$    | sd  | $R^2$    | sd  | $R^2$    | sd  | $R^2$    | sd  |
| 12    | 0.2      | 0.1 | 0.2      | 0.1 | 0.4      | 0.1 | 0.3      | 0.1 | 0.3      | 0.1 | 0.3      | 0.1 |
| Lca   | 0.2      | 0.1 | 0.3      | 0.1 | 0.4      | 0.1 | 0.3      | 0.1 | 0.3      | 0.0 | 0.3      | 0.0 |
| lkur  | 0.3      | 0.1 | 0.3      | 0.0 | 0.4      | 0.1 | 0.3      | 0.0 | 0.4      | 0.1 | 0.2      | 0.1 |
| M1    | 0.3      | 0.0 | 0.3      | 0.1 | 0.4      | 0.1 | 0.3      | 0.1 | 0.4      | 0.1 | 0.3      | 0.1 |
| M2    | 0.4      | 0.1 | 0.3      | 0.1 | 0.5      | 0.1 | 0.4      | 0.1 | 0.4      | 0.1 | 0.3      | 0.1 |
| M3    | 0.4      | 0.1 | 0.3      | 0.1 | 0.4      | 0.1 | 0.3      | 0.1 | 0.5      | 0.1 | 0.3      | 0.1 |
| M4    | 0.3      | 0.1 | 0.3      | 0.1 | 0.3      | 0.1 | 0.3      | 0.0 | 0.3      | 0.1 | 0.2      | 0.0 |
| M5    | 0.4      | 0.0 | 0.4      | 0.1 | 0.6      | 0.1 | 0.4      | 0.1 | 0.6      | 0.1 | 0.4      | 0.0 |
| M6    | 0.4      | 0.1 | 0.4      | 0.1 | 0.5      | 0.1 | 0.5      | 0.1 | 0.5      | 0.1 | 0.4      | 0.0 |
| M7    | 0.3      | 0.1 | 0.3      | 0.1 | 0.4      | 0.1 | 0.4      | 0.1 | 0.4      | 0.1 | 0.3      | 0.1 |
| M8    | 0.3      | 0.1 | 0.2      | 0.0 | 0.4      | 0.1 | 0.2      | 0.1 | 0.4      | 0.1 | 0.3      | 0.1 |
| M9    | 0.4      | 0.1 | 0.3      | 0.0 | 0.4      | 0.1 | 0.3      | 0.1 | 0.4      | 0.1 | 0.3      | 0.1 |
| M10   | 0.3      | 0.1 | 0.2      | 0.1 | 0.4      | 0.1 | 0.3      | 0.1 | 0.4      | 0.1 | 0.3      | 0.0 |
| M11   | 0.4      | 0.1 | 0.3      | 0.1 | 0.5      | 0.1 | 0.4      | 0.1 | 0.5      | 0.1 | 0.3      | 0.1 |
| M12   | 0.3      | 0.1 | 0.3      | 0.1 | 0.4      | 0.1 | 0.4      | 0.1 | 0.4      | 0.1 | 0.3      | 0.1 |
| Mx1   | 0.2      | 0.1 | 0.3      | 0.1 | 0.4      | 0.1 | 0.2      | 0.1 | 0.4      | 0.1 | 0.3      | 0.1 |
| MxM2  | 0.4      | 0.1 | 0.3      | 0.1 | 0.5      | 0.1 | 0.4      | 0.1 | 0.5      | 0.2 | 0.3      | 0.0 |
| MxM3  | 0.3      | 0.1 | 0.2      | 0.1 | 0.3      | 0.1 | 0.2      | 0.0 | 0.3      | 0.1 | 0.2      | 0.1 |
| MxM4  | 0.3      | 0.1 | 0.3      | 0.1 | 0.3      | 0.1 | 0.3      | 0.1 | 0.3      | 0.1 | 0.2      | 0.1 |
| MxM5  | 0.3      | 0.1 | 0.3      | 0.1 | 0.3      | 0.1 | 0.3      | 0.1 | 0.3      | 0.1 | 0.2      | 0.0 |
| MxM6  | 0.4      | 0.1 | 0.3      | 0.1 | 0.4      | 0.1 | 0.3      | 0.1 | 0.4      | 0.1 | 0.3      | 0.1 |
| MxM7  | 0.3      | 0.1 | 0.2      | 0.1 | 0.4      | 0.1 | 0.3      | 0.1 | 0.4      | 0.1 | 0.3      | 0.1 |
| MxM8  | 0.1      | 0.0 | 0.1      | 0.0 | 0.3      | 0.0 | 0.1      | 0.0 | 0.3      | 0.0 | 0.2      | 0.1 |
| MxM9  | 0.4      | 0.1 | 0.3      | 0.1 | 0.3      | 0.0 | 0.2      | 0.0 | 0.4      | 0.1 | 0.3      | 0.1 |
| MxM10 | 0.2      | 0.1 | 0.2      | 0.1 | 0.3      | 0.1 | 0.3      | 0.1 | 0.4      | 0.1 | 0.2      | 0.1 |
| MxM11 | 0.1      | 0.1 | 0.2      | 0.1 | 0.3      | 0.0 | 0.1      | 0.0 | 0.2      | 0.0 | 0.2      | 0.0 |
| MxM12 | 0.2      | 0.0 | 0.1      | 0.0 | 0.3      | 0.0 | 0.2      | 0.0 | 0.2      | 0.0 | 0.1      | 0.1 |
| MnM1  | 0.2      | 0.1 | 0.2      | 0.1 | 0.3      | 0.1 | 0.2      | 0.0 | 0.3      | 0.0 | 0.2      | 0.0 |

|        |     |     |     |     |     |     |     |     |     |     |     |     |
|--------|-----|-----|-----|-----|-----|-----|-----|-----|-----|-----|-----|-----|
| MnM2   | 0.2 | 0.0 | 0.2 | 0.1 | 0.3 | 0.1 | 0.2 | 0.1 | 0.2 | 0.0 | 0.2 | 0.1 |
| MnM3   | 0.2 | 0.1 | 0.2 | 0.1 | 0.3 | 0.1 | 0.2 | 0.1 | 0.3 | 0.1 | 0.2 | 0.1 |
| MnM4   | 0.1 | 0.1 | 0.1 | 0.0 | 0.2 | 0.0 | 0.1 | 0.0 | 0.2 | 0.0 | 0.2 | 0.1 |
| MnM5   | 0.3 | 0.1 | 0.2 | 0.1 | 0.4 | 0.1 | 0.2 | 0.1 | 0.4 | 0.1 | 0.4 | 0.1 |
| MnM6   | 0.3 | 0.1 | 0.3 | 0.0 | 0.3 | 0.1 | 0.3 | 0.1 | 0.4 | 0.1 | 0.3 | 0.0 |
| MnM7   | 0.2 | 0.1 | 0.2 | 0.0 | 0.3 | 0.1 | 0.3 | 0.0 | 0.3 | 0.1 | 0.2 | 0.1 |
| MnM8   | 0.3 | 0.1 | 0.2 | 0.0 | 0.3 | 0.1 | 0.3 | 0.1 | 0.3 | 0.1 | 0.2 | 0.1 |
| MnM9   | 0.3 | 0.1 | 0.3 | 0.1 | 0.3 | 0.1 | 0.2 | 0.1 | 0.3 | 0.1 | 0.3 | 0.1 |
| MnM10  | 0.3 | 0.1 | 0.1 | 0.0 | 0.3 | 0.0 | 0.3 | 0.1 | 0.3 | 0.0 | 0.3 | 0.0 |
| MnM11  | 0.3 | 0.1 | 0.2 | 0.1 | 0.4 | 0.1 | 0.3 | 0.1 | 0.3 | 0.1 | 0.3 | 0.1 |
| MnM12  | 0.1 | 0.0 | 0.1 | 0.0 | 0.3 | 0.0 | 0.1 | 0.0 | 0.1 | 0.0 | 0.2 | 0.0 |
| 1LF    | 0.3 | 0.1 | 0.3 | 0.1 | 0.3 | 0.1 | 0.3 | 0.1 | 0.2 | 0.1 | 0.2 | 0.0 |
| 3LF    | 0.3 | 0.1 | 0.3 | 0.1 | 0.3 | 0.1 | 0.3 | 0.1 | 0.3 | 0.1 | 0.2 | 0.0 |
| 7LF    | 0.3 | 0.1 | 0.3 | 0.1 | 0.3 | 0.1 | 0.3 | 0.1 | 0.3 | 0.1 | 0.2 | 0.0 |
| 30LF   | 0.3 | 0.1 | 0.3 | 0.1 | 0.3 | 0.1 | 0.3 | 0.1 | 0.3 | 0.1 | 0.2 | 0.1 |
| 90LF   | 0.3 | 0.1 | 0.3 | 0.1 | 0.3 | 0.1 | 0.3 | 0.1 | 0.3 | 0.1 | 0.3 | 0.1 |
| X75    | 0.3 | 0.1 | 0.3 | 0.1 | 0.3 | 0.1 | 0.3 | 0.1 | 0.3 | 0.1 | 0.3 | 0.1 |
| X95    | 0.2 | 0.1 | 0.2 | 0.1 | 0.3 | 0.1 | 0.3 | 0.1 | 0.2 | 0.1 | 0.2 | 0.1 |
| ZFD    | 0.2 | 0.1 | 0.2 | 0.0 | 0.3 | 0.1 | 0.1 | 0.1 | 0.3 | 0.1 | 0.3 | 0.1 |
| BFI    | 0.3 | 0.1 | 0.3 | 0.1 | 0.3 | 0.1 | 0.3 | 0.1 | 0.2 | 0.1 | 0.2 | 0.1 |
| 1HF    | 0.1 | 0.0 | 0.2 | 0.0 | 0.3 | 0.0 | 0.2 | 0.1 | 0.3 | 0.0 | 0.2 | 0.1 |
| 3 HF   | 0.2 | 0.0 | 0.2 | 0.1 | 0.3 | 0.0 | 0.2 | 0.1 | 0.3 | 0.0 | 0.2 | 0.1 |
| 7 HF   | 0.2 | 0.0 | 0.2 | 0.1 | 0.4 | 0.1 | 0.2 | 0.1 | 0.3 | 0.0 | 0.3 | 0.1 |
| 30 HF  | 0.1 | 0.0 | 0.2 | 0.1 | 0.3 | 0.1 | 0.2 | 0.1 | 0.2 | 0.0 | 0.2 | 0.1 |
| 90 HF  | 0.1 | 0.0 | 0.1 | 0.1 | 0.2 | 0.0 | 0.2 | 0.0 | 0.2 | 0.1 | 0.2 | 0.1 |
| X25    | 0.3 | 0.0 | 0.3 | 0.0 | 0.3 | 0.1 | 0.3 | 0.0 | 0.4 | 0.1 | 0.3 | 0.1 |
| X5     | 0.3 | 0.1 | 0.2 | 0.0 | 0.4 | 0.1 | 0.3 | 0.1 | 0.3 | 0.1 | 0.4 | 0.1 |
| FRE1   | 0.5 | 0.1 | 0.4 | 0.1 | 0.5 | 0.1 | 0.5 | 0.1 | 0.6 | 0.1 | 0.4 | 0.1 |
| FRE3   | 0.6 | 0.1 | 0.6 | 0.1 | 0.6 | 0.1 | 0.6 | 0.1 | 0.6 | 0.1 | 0.4 | 0.1 |
| FRE7   | 0.6 | 0.1 | 0.5 | 0.1 | 0.6 | 0.1 | 0.5 | 0.1 | 0.6 | 0.1 | 0.5 | 0.1 |
| nPHigh | 0.5 | 0.1 | 0.5 | 0.1 | 0.6 | 0.1 | 0.5 | 0.1 | 0.6 | 0.1 | 0.4 | 0.1 |
| dPHigh | 0.4 | 0.1 | 0.4 | 0.1 | 0.5 | 0.1 | 0.5 | 0.1 | 0.5 | 0.1 | 0.3 | 0.1 |
| JMax   | 0.2 | 0.1 | 0.1 | 0.0 | 0.2 | 0.1 | 0.2 | 0.0 | 0.2 | 0.1 | 0.1 | 0.0 |
| JMin   | 0.2 | 0.1 | 0.1 | 0.1 | 0.2 | 0.1 | 0.2 | 0.0 | 0.2 | 0.1 | 0.2 | 0.1 |
| Pred   | 0.4 | 0.1 | 0.4 | 0.1 | 0.5 | 0.0 | 0.3 | 0.1 | 0.4 | 0.1 | 0.3 | 0.1 |

|         |     |     |     |     |     |     |     |     |     |     |     |     |
|---------|-----|-----|-----|-----|-----|-----|-----|-----|-----|-----|-----|-----|
| Pos     | 0.2 | 0.0 | 0.2 | 0.1 | 0.4 | 0.1 | 0.3 | 0.1 | 0.4 | 0.0 | 0.3 | 0.0 |
| nPos    | 0.4 | 0.0 | 0.4 | 0.0 | 0.4 | 0.1 | 0.4 | 0.0 | 0.4 | 0.1 | 0.4 | 0.1 |
| Neg     | 0.2 | 0.0 | 0.2 | 0.1 | 0.3 | 0.1 | 0.3 | 0.1 | 0.4 | 0.0 | 0.2 | 0.0 |
| nNeg    | 0.4 | 0.0 | 0.4 | 0.0 | 0.4 | 0.1 | 0.4 | 0.0 | 0.4 | 0.1 | 0.4 | 0.1 |
| Rev     | 0.3 | 0.1 | 0.3 | 0.1 | 0.3 | 0.1 | 0.3 | 0.1 | 0.3 | 0.1 | 0.3 | 0.1 |
| sdM1    | 0.2 | 0.1 | 0.3 | 0.1 | 0.3 | 0.1 | 0.1 | 0.0 | 0.3 | 0.1 | 0.3 | 0.1 |
| sdM2    | 0.3 | 0.1 | 0.2 | 0.1 | 0.4 | 0.1 | 0.3 | 0.1 | 0.4 | 0.1 | 0.3 | 0.0 |
| sdM3    | 0.2 | 0.1 | 0.2 | 0.0 | 0.3 | 0.1 | 0.3 | 0.0 | 0.3 | 0.1 | 0.2 | 0.0 |
| sdM4    | 0.2 | 0.1 | 0.3 | 0.1 | 0.3 | 0.1 | 0.3 | 0.1 | 0.3 | 0.1 | 0.2 | 0.1 |
| sdM5    | 0.3 | 0.1 | 0.3 | 0.1 | 0.4 | 0.1 | 0.4 | 0.1 | 0.4 | 0.1 | 0.3 | 0.0 |
| sdM6    | 0.4 | 0.1 | 0.3 | 0.1 | 0.4 | 0.1 | 0.3 | 0.1 | 0.4 | 0.1 | 0.3 | 0.1 |
| sdM7    | 0.3 | 0.1 | 0.3 | 0.1 | 0.4 | 0.1 | 0.3 | 0.1 | 0.4 | 0.1 | 0.4 | 0.1 |
| sdM8    | 0.2 | 0.1 | 0.2 | 0.0 | 0.4 | 0.0 | 0.2 | 0.0 | 0.4 | 0.1 | 0.3 | 0.1 |
| sdM9    | 0.4 | 0.1 | 0.3 | 0.1 | 0.4 | 0.0 | 0.3 | 0.0 | 0.4 | 0.1 | 0.3 | 0.1 |
| sdM10   | 0.2 | 0.1 | 0.2 | 0.1 | 0.3 | 0.1 | 0.3 | 0.1 | 0.4 | 0.1 | 0.3 | 0.1 |
| sdM11   | 0.1 | 0.1 | 0.2 | 0.1 | 0.3 | 0.1 | 0.2 | 0.0 | 0.2 | 0.1 | 0.3 | 0.1 |
| sdM12   | 0.2 | 0.1 | 0.2 | 0.1 | 0.3 | 0.0 | 0.1 | 0.0 | 0.2 | 0.0 | 0.2 | 0.1 |
| sd1LF   | 0.5 | 0.1 | 0.4 | 0.1 | 0.4 | 0.1 | 0.4 | 0.1 | 0.4 | 0.1 | 0.4 | 0.1 |
| sd3LF   | 0.4 | 0.1 | 0.3 | 0.1 | 0.4 | 0.1 | 0.4 | 0.1 | 0.4 | 0.1 | 0.4 | 0.1 |
| sd7LF   | 0.4 | 0.1 | 0.3 | 0.1 | 0.4 | 0.1 | 0.4 | 0.1 | 0.4 | 0.1 | 0.3 | 0.1 |
| sd30LF  | 0.4 | 0.1 | 0.4 | 0.1 | 0.4 | 0.1 | 0.4 | 0.1 | 0.4 | 0.1 | 0.3 | 0.1 |
| sd90LF  | 0.4 | 0.1 | 0.3 | 0.1 | 0.4 | 0.1 | 0.3 | 0.1 | 0.4 | 0.1 | 0.4 | 0.1 |
| sdBFI   | 0.2 | 0.1 | 0.2 | 0.1 | 0.3 | 0.1 | 0.2 | 0.0 | 0.4 | 0.1 | 0.3 | 0.1 |
| sd1HF   | 0.3 | 0.1 | 0.3 | 0.1 | 0.3 | 0.1 | 0.3 | 0.1 | 0.3 | 0.1 | 0.3 | 0.0 |
| sd3 HF  | 0.2 | 0.0 | 0.1 | 0.0 | 0.3 | 0.0 | 0.1 | 0.0 | 0.3 | 0.1 | 0.2 | 0.0 |
| sd7 HF  | 0.2 | 0.0 | 0.1 | 0.1 | 0.3 | 0.0 | 0.1 | 0.0 | 0.3 | 0.1 | 0.2 | 0.0 |
| sd30 HF | 0.2 | 0.0 | 0.2 | 0.1 | 0.3 | 0.0 | 0.1 | 0.0 | 0.3 | 0.1 | 0.2 | 0.0 |
| sd90 HF | 0.3 | 0.1 | 0.3 | 0.1 | 0.3 | 0.0 | 0.2 | 0.1 | 0.3 | 0.1 | 0.2 | 0.0 |
| sdFRE1  | 0.3 | 0.1 | 0.3 | 0.1 | 0.3 | 0.1 | 0.2 | 0.1 | 0.3 | 0.0 | 0.2 | 0.1 |
| sdFRE3  | 0.3 | 0.1 | 0.2 | 0.1 | 0.4 | 0.1 | 0.3 | 0.1 | 0.5 | 0.1 | 0.3 | 0.1 |
| sdFRE7  | 0.1 | 0.0 | 0.1 | 0.0 | 0.2 | 0.1 | 0.1 | 0.0 | 0.3 | 0.1 | 0.1 | 0.1 |
| sdnPH   | 0.2 | 0.0 | 0.1 | 0.0 | 0.3 | 0.1 | 0.2 | 0.0 | 0.2 | 0.0 | 0.2 | 0.0 |
| sdJMax  | 0.2 | 0.1 | 0.2 | 0.1 | 0.3 | 0.1 | 0.2 | 0.0 | 0.3 | 0.1 | 0.2 | 0.1 |
| sdJMin  | 0.4 | 0.1 | 0.3 | 0.1 | 0.4 | 0.0 | 0.4 | 0.0 | 0.4 | 0.0 | 0.5 | 0.1 |
| sdnNeg  | 0.3 | 0.1 | 0.2 | 0.0 | 0.3 | 0.1 | 0.2 | 0.0 | 0.3 | 0.1 | 0.2 | 0.0 |



|        |     |     |     |     |     |     |     |     |     |     |     |     |
|--------|-----|-----|-----|-----|-----|-----|-----|-----|-----|-----|-----|-----|
| sdnPos | 0.1 | 0.1 | 0.2 | 0.1 | 0.3 | 0.1 | 0.1 | 0.0 | 0.3 | 0.1 | 0.2 | 0.0 |
| sdRev  | 0.1 | 0.0 | 0.1 | 0.0 | 0.3 | 0.0 | 0.1 | 0.0 | 0.3 | 0.1 | 0.1 | 0.0 |
